# PSYCHIATRIC SERVICES

A Journal of the American Psychiatric Association

- ◆ Shared Decision Making: A Contemporary Practice With Roots in Antiquity
- ◆ Mental Health Services for Children and Adolescents: Five Current Investigations
- ◆ Clinician Training to Address Tobacco Use: Promising Findings
- ◆ Improving Outcomes for Veterans: New Studies Assess Care and Benefits

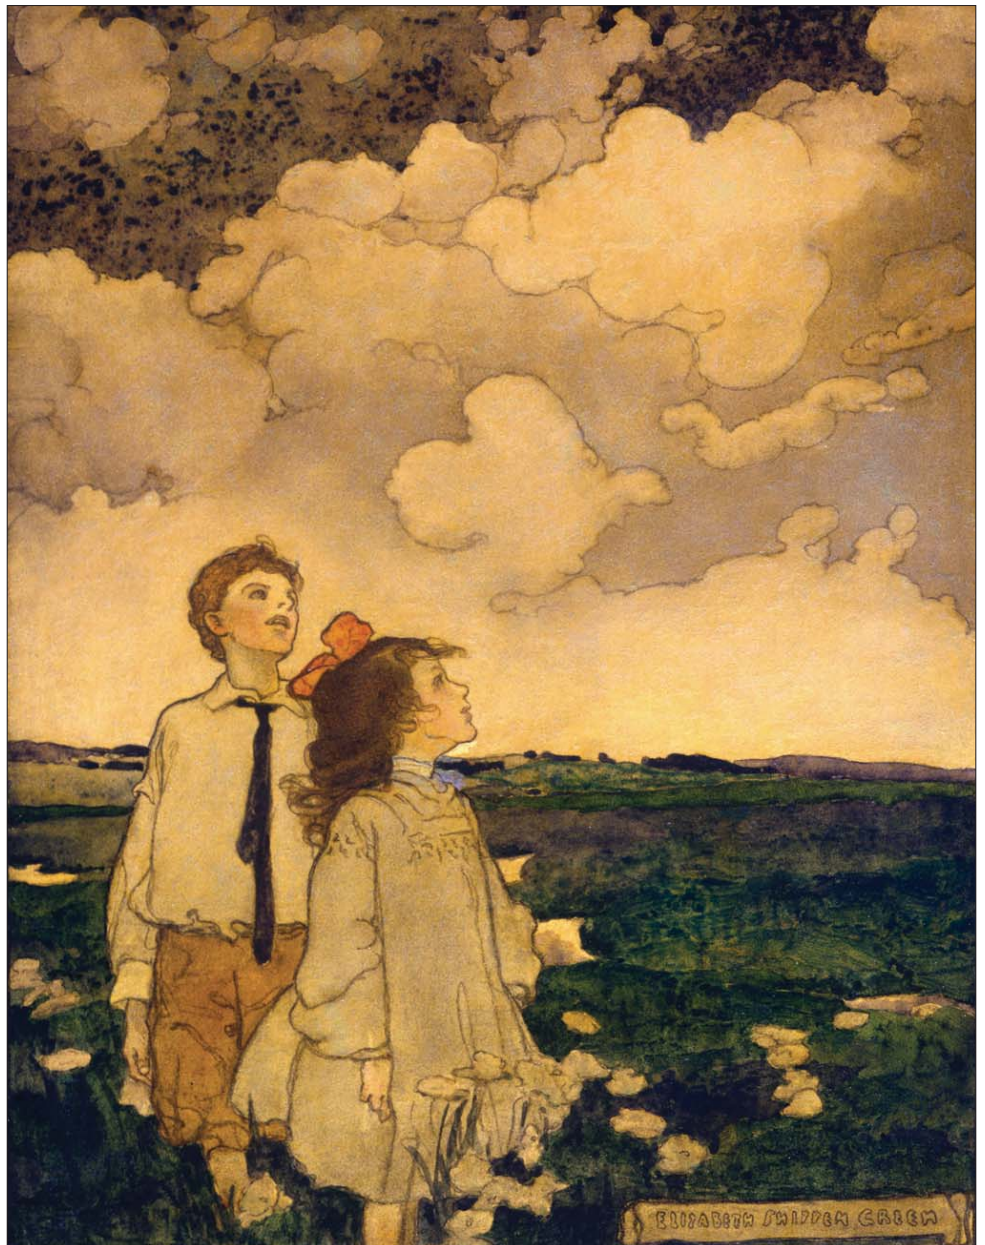

Source: http://ps.psychiatryonline.org/doi/suppl/10.1176/ps.2014.65.issue-12/suppl_file/cover.pdf
